# Supplementary material
Source: publisher figshare collection journal article supplement (https://geolsoc.figshare.com/ndownloader/files/34180042)
Supplement: Supplementary file 1 [file 34180042]

#NEXUS
BEGIN TREES;

	UTREE 1 = (Amphimedon_queenslandica: 7.359889, (Trichoplax_adhaerens: 6.623868, (Acropora_digitifera: 6.416748, ((Ciona_intestinalis: 5.882761, (Danio_rerio: 4.371278, (Mus_musculus: 1.155373, Homo_sapiens: 1.155373) [&95%={0.65171, 1.64038}]: 3.215905) [&95%={4.21508, 4.53607}]: 1.511484) [&95%={5.64697, 6.05795}]: 0.265282, ((Brachionus_sp: 5.872596, ((Crassostrea_gigas: 5.371945, (Lottia_gigantea: 5.040653, Aplysia_californica: 5.040653) [&95%={4.77157, 5.25559}]: 0.331292) [&95%={5.32172, 5.46962}]: 0.343095, (Alvinella_pompejana: 5.237135, (Helobdella_robusta: 4.910322, Capitella_telata: 4.910322) [&95%={4.21524, 5.36438}]: 0.326813) [&95%={4.84949, 5.519}]: 0.477905) [&95%={5.61592, 5.82493}]: 0.157557) [&95%={5.77157, 5.98923}]: 0.105596, ((Armorloricus_elegans: 5.782258, ((Meiopriapulus_sp: 5.180071, (Priapulus_caudatus: 2.131564, Halicryptus_spinulosus: 2.131564) [&95%={0.990144, 3.66042}]: 3.048507) [&95%={4.24258, 5.55435}]: 0.471870, (Pycnophyes_kielensis: 4.823049, (Echinoderes_sp: 2.306750, Echinoderes_horni: 2.306750) [&95%={1.12909, 3.72112}]: 2.516299) [&95%={3.8575, 5.35038}]: 0.828892) [&95%={5.48501, 5.79086}]: 0.130317) [&95%={5.67207, 5.89902}]: 0.093699, (((Gordius_sp: 2.975938, Nectonema_munidae: 2.975938) [&95%={1.07934, 4.80739}]: 1.958915, ((Xiphinema_index: 3.180566, (Trichuris_muris: 1.851852, Trichinella_spiralis: 1.851852) [&95%={1.01149, 3.16582}]: 1.328714) [&95%={2.30033, 4.31611}]: 0.491697, ((Pristionchus_pacificus: 1.658026, Caenorhabditis_elegans: 1.658026) [&95%={1.30421, 2.59957}]: 0.666295, (Brugia_malayi: 1.686313, Ascaris_sum: 1.686313) [&95%={1.15096, 2.66534}]: 0.638008) [&95%={1.7475, 3.37604}]: 1.347943) [&95%={2.77801, 4.69902}]: 1.262589) [&95%={4.18889, 5.45594}]: 0.855834, (((Actinarctus_doryphorus: 3.689154, (Echiniscus_testudo: 1.010997, Echiniscus_bisetosus: 1.010997) [&95%={0.199894, 2.15386}]: 2.678157) [&95%={2.11573, 4.59941}]: 1.060477, (Milnesium_tardigradum: 3.656954, (Richtersius_coronifer: 2.626364, (Ramazzottius_varieornatus: 2.171491, Hypsibius_dujardini: 2.171491) [&95%={1.05739, 3.52552}]: 0.454873) [&95%={1.36664, 3.91483}]: 1.030590) [&95%={2.2293, 4.58973}]: 1.092677) [&95%={3.64967, 5.21708}]: 0.982318, ((Epiperipatus_sp: 2.407435, (Peripatus_sp: 0.995747, Euperipatoides_kanagrensis: 0.995747) [&95%={0.294493, 2.78159}]: 1.411689) [&95%={1.44722, 4.83178}]: 3.228769, (((Pycnogonum_sp: 4.525347, Anoplodactylus_eroticus: 4.525347) [&95%={4.30759, 4.87353}]: 0.850291, (Limulus_polyphemus: 5.061004, ((Siro_boyerae: 4.595748, Ixodes_scapularis: 4.595748) [&95%={4.23095, 4.87369}]: 0.270068, (Chaerilus_celebensis: 4.605198, (Acanthoscurria_gomesiana: 3.540358, Neoscona_arabesca: 3.540358) [&95%={3.02926, 4.25317}]: 1.064840) [&95%={4.37551, 4.86212}]: 0.260618) [&95%={4.71867, 5.02909}]: 0.195188) [&95%={5.00719, 5.16986}]: 0.314634) [&95%={5.30112, 5.46345}]: 0.108395, (((Scutigera_coleoptrata: 4.802772, (Strigamia_maritima: 4.061020, Lithobius_fortificatus: 4.061020) [&95%={3.83503, 4.50876}]: 0.741752) [&95%={4.51887, 5.03489}]: 0.395306, ((Prostemmiulus_sp: 3.874505, Polydesmus_angustus: 3.874505) [&95%={2.72978, 4.66164}]: 0.961340, (Polyxenus_lagurus: 4.588187, Glomeridesmus_sp: 4.588187) [&95%={3.94893, 4.9693}]: 0.247657) [&95%={4.42321, 5.0909}]: 0.362233) [&95%={5.04655, 5.3171}]: 0.223654, ((Meganyctiphanes_norvegica: 3.175796, (Petrolisthes_cinctipes: 2.472985, Litopenaeus_vannamaei: 2.472985) [&95%={1.08784, 3.72193}]: 0.702812) [&95%={1.56389, 4.22087}]: 2.005957, ((Xibalbanus_tumulensis: 4.914253, (Tigriopus_japonicus: 3.291942, Eurytemora_affinis: 3.291942) [&95%={1.5351, 4.25058}]: 1.622311) [&95%={4.75413, 5.04606}]: 0.156337, ((Artemia_francisca: 4.337535, (Daphnia_magna: 1.392838, Daphnia_pulex: 1.392838) [&95%={0.318034, 2.62949}]: 2.944697) [&95%={4.06745, 4.65549}]: 0.655173, (Folsomia_candida: 4.838978, (Meinertellus_cundinamarcensis: 4.580665, ((Ephemera_danica: 4.004310, Calopteryx_splendens: 4.004310) [&95%={3.6392, 4.27913}]: 0.273005, ((Tetrix_subulata: 3.655459, (Peruphasma_schultei: 3.339984, (Periplaneta_americana: 2.475294, Mantis_religiosa: 2.475294) [&95%={1.54537, 3.22023}]: 0.864689) [&95%={2.87757, 3.72013}]: 0.315475) [&95%={3.33693, 3.93267}]: 0.367594, (Cercopis_vulnerata: 3.881634, ((Gynaikothrips_ficorum: 3.295555, Nasonia_sp: 3.295555) [&95%={2.91859, 3.57341}]: 0.376362, ((Platycentropus_radiatus: 2.540715, Parides_euridedes: 2.540715) [&95%={2.06284, 2.98534}]: 0.866340, (Tribolium_castaneum: 3.141280, Eurelon_nostras: 3.141280) [&95%={3.07104, 3.31786}]: 0.265775) [&95%={3.27045, 3.59422}]: 0.264861) [&95%={3.48953, 3.8728}]: 0.209718) [&95%={3.67851, 4.08756}]: 0.141419) [&95%={3.80914, 4.23147}]: 0.254262) [&95%={4.05574, 4.48339}]: 0.303351) [&95%={4.38237, 4.75391}]: 0.258313) [&95%={4.69654, 4.96685}]: 0.153731) [&95%={4.89563, 5.09427}]: 0.077882) [&95%={4.99679, 5.16226}]: 0.111163) [&95%={5.14143, 5.26304}]: 0.239978) [&95%={5.34884, 5.50862}]: 0.062301) [&95%={5.40593, 5.57416}]: 0.152172) [&95%={5.54793, 5.73477}]: 0.095744) [&95%={5.63931, 5.83774}]: 0.058738) [&95%={5.69566, 5.90001}]: 0.085270) [&95%={5.77795, 5.99092}]: 0.102235) [&95%={5.87393, 6.10229}]: 0.169852) [&95%={6.03634, 6.29053}]: 0.268704) [&95%={6.31225, 6.5874}]: 0.207121) [&95%={6.4515, 6.90613}]: 0.736020) [&95%={6.6057, 8.32297}];

END;
